# Supplementary material for: Properties and Modeling of GWAS when Complex Disease Risk Is Due to Non-Complementing, Deleterious Mutations in Genes of Large Effect
Source: PLOS journal article supplement (doi:10.1371/journal.pgen.1003258), 2013-02-21
Supplement: S2 (10.1371/journal.pgen.1003258.s002) [file journal.pgen.1003258.s002]

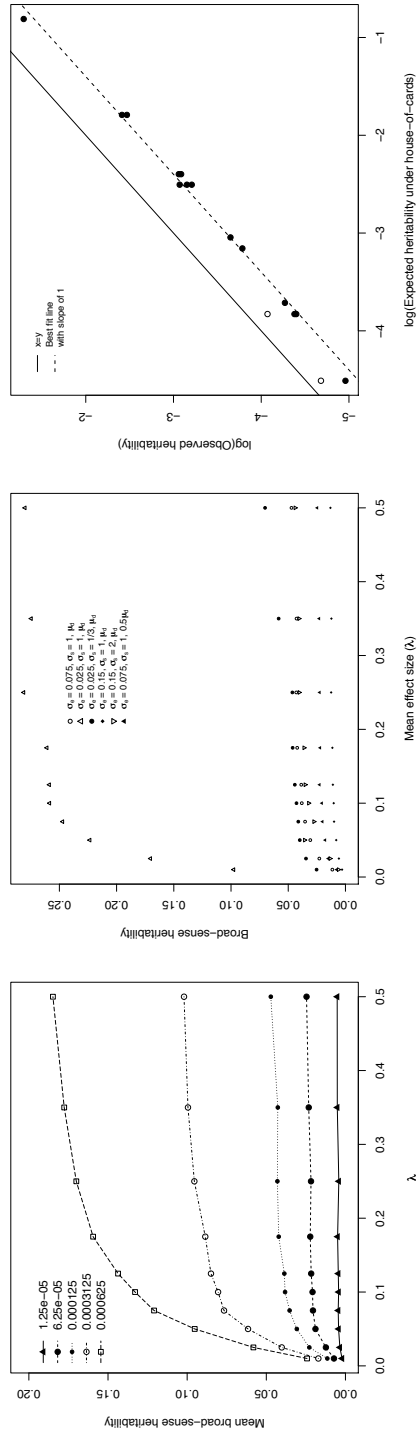

(a) Effect of mutation rate

(b) Sensitivity to model parameters

(c) Comparison to House-of-Cards predictions

Figure S2: Broad-sense heritability in different parts of the parameter space.
