# Supplementary material for: Properties and Modeling of GWAS when Complex Disease Risk Is Due to Non-Complementing, Deleterious Mutations in Genes of Large Effect
Source: PLOS journal article supplement (doi:10.1371/journal.pgen.1003258), 2013-02-21
Supplement: S5 (10.1371/journal.pgen.1003258.s005) [file journal.pgen.1003258.s005]

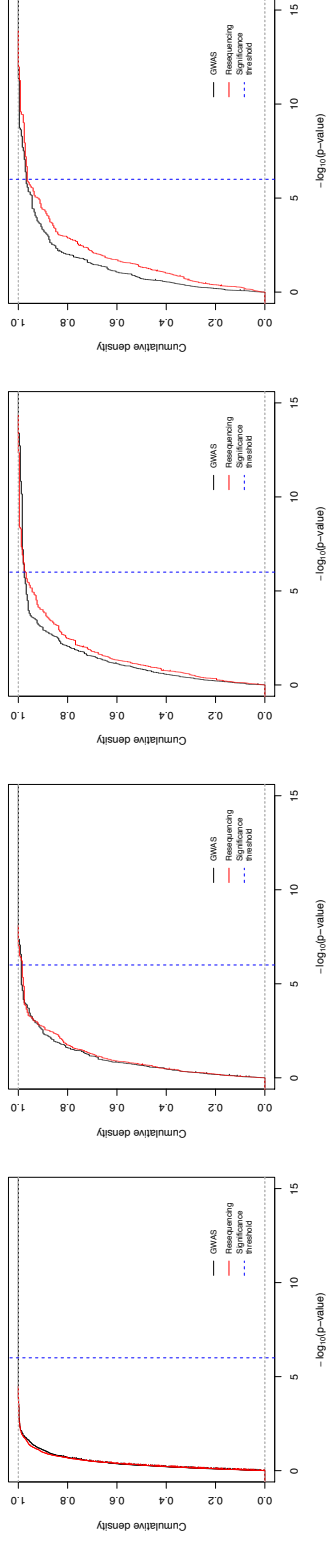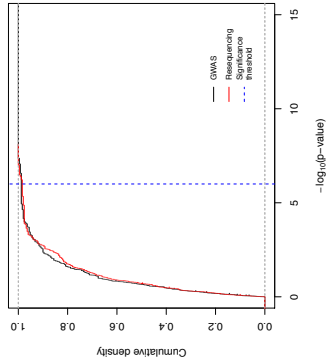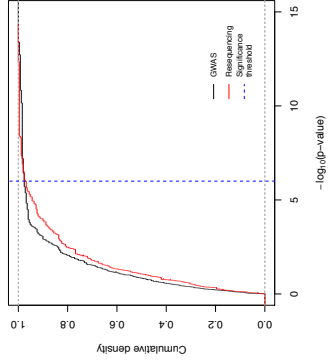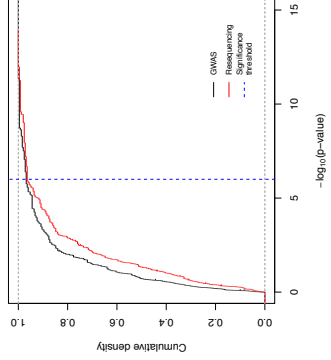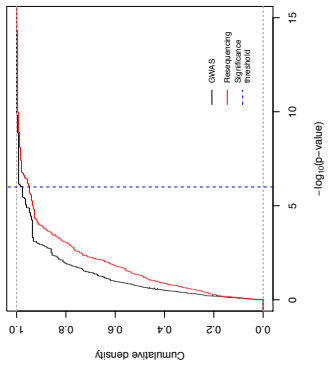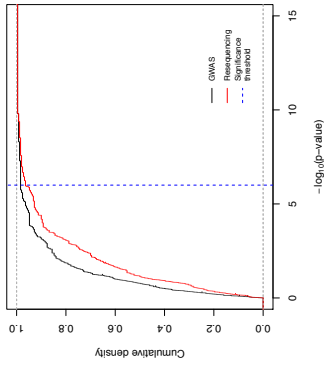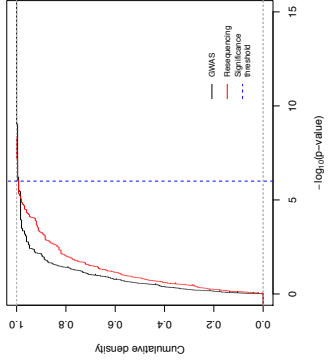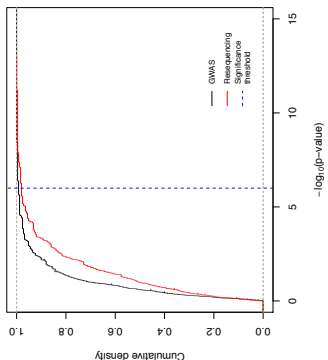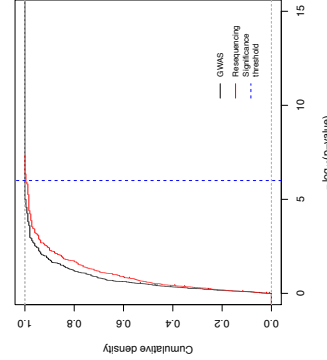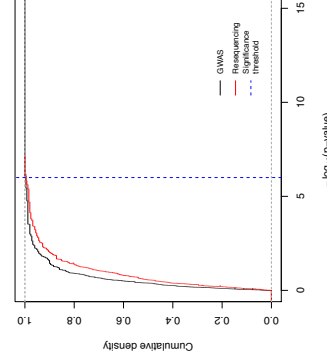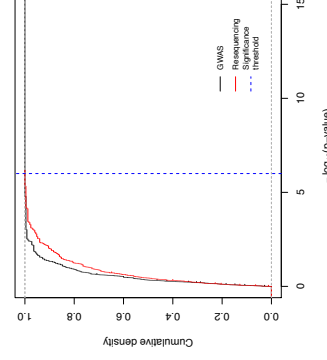

(i)  $\lambda = 0.25$

(j)  $\lambda = 0.35$

(k)  $\lambda = 0.5$

Figure S5: Distributions of  $-\log_{10}$  p-values for the Madsen and Browning [4] statistic.
